# Supplementary material
Source: MDPI journal article supplement (https://www.mdpi.com/search?q=land-10-00313)
Supplement: s001 [file land-10-00313-s001.pdf]

Annex1: Family, life form (LF), habitat class (HC), livestock palatability index (PI), Tunisian endemic (TE) of main species recorded in arid and desert rangeland of Tataouine, Tunisia (spring 2018): 0, Not palatable; 1, Occasionally palatable; 2, Fairly palatable; 3, Palatable; 4, Very palatable; 5, Highly palatable.

| Species                                                                     | Family           | Life form         | H. class | Endemism | PI |
|-----------------------------------------------------------------------------|------------------|-------------------|----------|----------|----|
| <i>Acacia karroo</i> Hayne                                                  | Fabaceae         | Macrophanerophyte | Tree     | -        | 3  |
| <i>Adonis microcarpa</i> DC.                                                | Ranunculaceae    | Therophyte        | Herb     | -        | 0  |
| <i>Aegilops geniculata</i> Roth                                             | Poaceae          | Therophyte        | Herb     | -        | 3  |
| <i>Aegilops ventricosa</i> Tausch                                           | Poaceae          | Therophyte        | Herb     | -        | 4  |
| <i>Aeluropus litoralis</i> (Gouan) Parl.                                    | Poaceae          | Therophyte        | Herb     | -        | 1  |
| <i>Ajuga iova</i> (L.) Schreb.                                              | Lamiaceae        | Therophyte        | Herb     | -        | 0  |
| <i>Allium ampeloprasum</i> L.                                               | Alliaceae        | Geophyte          | Herb     | -        | 1  |
| <i>Allium roseum</i> L.                                                     | Alliaceae        | Geophyte          | Herb     | -        | 1  |
| <i>Amaranthus blitoides</i> S.Watson                                        | Amaranthaceae    | Therophyte        | Herb     | -        | 0  |
| <i>Ammodaucus leucotrichus</i> Coss. & Durieu                               | Apiaceae         | Therophyte        | Herb     | -        | 1  |
| <i>Anabasis oropediorum</i> Maire                                           | Amaranthaceae    | Chamaephyte       | Shrub    | -        | 5  |
| <i>Anacyclus clavatus</i> (Desf.) Pers.                                     | Asteraceae       | Therophyte        | Herb     | -        | 3  |
| <i>Anacyclus monanthos</i> (L.) Thell.                                      | Asteraceae       | Therophyte        | Herb     | -        | 3  |
| <i>Anagallis arvensis</i> L.                                                | Primulaceae      | Therophyte        | Herb     | -        | 2  |
| <i>Anarrhinum fruticosum</i> Desf. subsp. <i>brevifolium</i>                | Scrophulariaceae | Chamaephyte       | Shrub    | TE       | 4  |
| <i>Anchusa hispida</i> Forssk.                                              | Boraginaceae     | Therophyte        | Herb     | -        | 3  |
| <i>Andrachne telephioides</i> L.                                            | Euphorbiaceae    | Hemicryptophyte   | Herb     | -        | 2  |
| <i>Anthemis pedunculata</i> Desf. subsp. <i>pedunculata</i>                 | Asteraceae       | Therophyte        | Herb     | -        | 2  |
| <i>Anthyllis henoniana</i> Batt.                                            | Fabaceae         | Chamaephyte       | Shrub    | -        | 4  |
| <i>Argyrolobium uniflorum</i> (Deene.) Jaub. & Spach                        | Fabaceae         | Chamaephyte       | Herb     | -        | 5  |
| <i>Arnebia decumbens</i> (Vent.) Coss. & Kralik                             | Boraginaceae     | Therophyte        | Herb     | -        | 4  |
| <i>Artemisia campestris</i> L.                                              | Asteraceae       | Chamaephyte       | Shrub    | -        | 1  |
| <i>Artemisia herba-alba</i> Asso                                            | Asteraceae       | Chamaephyte       | Shrub    | -        | 3  |
| <i>Asparagus albus</i> L.                                                   | Asparagaceae     | Chamaephyte       | Shrub    | -        | 1  |
| <i>Asparagus horridus</i> L.                                                | Asparagaceae     | Chamaephyte       | Shrub    | -        | 0  |
| <i>Asphodelus refractus</i> Boiss.                                          | Asphodelaceae    | Therophyte        | Herb     | -        | 0  |
| <i>Asphodelus tenuifolius</i> Cav.                                          | Asphodelaceae    | Therophyte        | Herb     | -        | 1  |
| <i>Astragalus armatus</i> Willd.                                            | Fabaceae         | Chamaephyte       | Shrub    | -        | 2  |
| <i>Astragalus arpilobus</i> subsp. <i>hauarensis</i> (Boiss.) Podlech       | Fabaceae         | Therophyte        | Herb     | -        | 4  |
| <i>Astragalus asterias</i> Steven.                                          | Fabaceae         | Therophyte        | Herb     | -        | 4  |
| <i>Astragalus caprinus</i> L.                                               | Fabaceae         | Hemicryptophyte   | Herb     | -        | 1  |
| <i>Astragalus crenatus</i> Schult                                           | Fabaceae         | Therophyte        | Herb     | -        | 2  |
| <i>Astragalus hamosus</i> L.                                                | Fabaceae         | Therophyte        | Herb     | -        | 4  |
| <i>Atractylis cancellata</i> L.                                             | Asteraceae       | Therophyte        | Herb     | -        | 0  |
| <i>Atractylis carduus</i> (Forssk.) C. Chr.                                 | Asteraceae       | Therophyte        | Herb     | -        | 0  |
| <i>Atractylis prolifera</i> Boiss.                                          | Asteraceae       | Therophyte        | Herb     | -        | 1  |
| <i>Atractylis serratuloides</i> Sieber ex Cass.                             | Asteraceae       | Chamaephyte       | Shrub    | -        | 2  |
| <i>Atriplex halimus</i> L.                                                  | Amaranthaceae    | Nanophanerophyte  | Shrub    | -        | 3  |
| <i>Atriplex lindleyi</i> Moq. subsp. <i>inflata</i> (F. Muell.) P.G. Wilson | Amaranthaceae    | Chamaephyte       | Shrub    | -        | 0  |
| <i>Avena sterilis</i> L.                                                    | Poaceae          | Therophyte        | Herb     | -        | 4  |
| <i>Bassia muricata</i> (L.) Asch.                                           | Amaranthaceae    | Chamaephyte       | Herb     | -        | 0  |
| <i>Beta macrocarpa</i> Guss.                                                | Amaranthaceae    | Therophyte        | Herb     | -        | 1  |
| <i>Bituminaria bituminosa</i> (L.) E.H. Stirt.                              | Fabaceae         | Hemicryptophyte   | Herb     | -        | 2  |
| <i>Brachypodium distachyon</i> (L.) P. Beauv                                | Poaceae          | Therophyte        | Herb     | -        | 3  |
| <i>Brassica tournefortii</i> Gouan.                                         | Brassicaceae     | Therophyte        | Herb     | -        | 3  |
| <i>Bromus rubens</i> L.                                                     | Poaceae          | Therophyte        | Herb     | -        | 2  |
| <i>Bupleurum semicompositum</i> L.                                          | Apiaceae         | Therophyte        | Herb     | -        | 0  |
| <i>Calendula arvensis</i> L.                                                | Asteraceae       | Therophyte        | Herb     | -        | 2  |
| <i>Calendula suffruticosa</i> Vahl.                                         | Asteraceae       | Therophyte        | Herb     | -        | 2  |
| <i>Calicotome villosa</i> (Poir.) Link.                                     | Fabaceae         | Nanophanerophyte  | Shrub    | -        | 2  |
| <i>Calligonum polygonoides</i> L.                                           | Polygonaceae     | Nanophanerophyte  | Shrub    | -        | 4  |

|                                                           |                |                   |         |   |   |
|-----------------------------------------------------------|----------------|-------------------|---------|---|---|
| <i>Capparis spinosa</i> L.                                | Capparaceae    | Nanophanerophyte  | Shrub   | - | 2 |
| <i>Cardopatum amethystinum</i> Spach                      | Asteraceae     | Hemicryptophyte   | Herb    | - | 0 |
| <i>Carrichtera annua</i> (L.) DC.                         | Brassicaceae   | Therophyte        | Herb    | - | 1 |
| <i>Carthamus eriocephalus</i> (Boiss.) Greuter            | Asteraceae     | Therophyte        | Herb    | - | 1 |
| <i>Catananche arenaria</i> Coss. & Durieu                 | Asteraceae     | Therophyte        | Herb    | - | 4 |
| <i>Cenchrus ciliaris</i> L.                               | Poaceae        | Hemicryptophyte   | Herb    | - | 5 |
| <i>Centaurea bimorpha</i> Viv.                            | Asteraceae     | Therophyte        | Herb    | - | 0 |
| <i>Centaurea furfuracea</i> Coss. & Durieu.               | Asteraceae     | Therophyte        | Herb    | - | 3 |
| <i>Centaurea glomerata</i> Vahl.                          | Asteraceae     | Therophyte        | Herb    | - | 2 |
| <i>Chenopodium murale</i> (L.) S.Fuentes, Uotila & Borsch | Amaranthaceae  | Therophyte        | Herb    | - | 2 |
| <i>Chrozophora tinctoria</i> (L.)                         | Euphorbiaceae  | Therophyte        | Herb    | - | 0 |
| <i>Cistanche phelypaea</i> subsp. <i>lutea</i>            | Orobanchaceae  | Parasites         | Herb    | - | 1 |
| <i>Cistanche violacea</i> (Desf.) Hoff. & Link            | Orobanchaceae  | Parasites         | Herb    | - | 1 |
| <i>Citrullus colocynthis</i> (L.) Schrad.                 | Cucurbitaceae  | Hemicryptophyte   | Herb    | - | 0 |
| <i>Cleome amblyocarpa</i> Barratte & Murb.                | Cleomaceae     | Hemicryptophyte   | Herb    | - | 0 |
| <i>Convolvulus supinus</i> Coss. & Kralik                 | Convolvulaceae | Therophyte        | Climber | - | 1 |
| <i>Coris monspeliensis</i> L.                             | Primulaceae    | Hemicryptophyte   | Herb    | - | 0 |
| <i>Coronilla scorpioides</i> (L.) Koch.                   | Fabaceae       | Therophyte        | Herb    | - | 2 |
| <i>Cuscuta epithymum</i> (L.) L.                          | Cuscutaceae    | Parasites         | Herb    | - | 1 |
| <i>Cutandia dichotoma</i> (Forssk.) Trab.                 | Poaceae        | Therophyte        | Herb    | - | 4 |
| <i>Cymbopogon schoenanthus</i> (L.) Spreng.               | Poaceae        | Hemicryptophyte   | Herb    | - | 4 |
| <i>Cynara cardunculus</i> L. subsp. <i>Cardunculus</i>    | Asteraceae     | Hemicryptophyte   | Herb    | - | 1 |
| <i>Cynodon dactylon</i> (L.) Pers.                        | Poaceae        | Hemicryptophyte   | Herb    | - | 5 |
| <i>Cynomorium coccineum</i> L.                            | Cynomoriaceae  | Parasites         | Herb    | - | 0 |
| <i>Dactylis glomerata</i> L.                              | Poaceae        | Hemicryptophyte   | Herb    | - | 5 |
| <i>Datura stramonium</i> L.                               | Solanaceae     | Therophyte        | Herb    | - | 0 |
| <i>Daucus carota</i> L.                                   | Apiaceae       | Hemicryptophyte   | Herb    | - | 3 |
| <i>Daucus sahariensis</i> Murb.                           | Apiaceae       | Therophyte        | Herb    | - | 3 |
| <i>Delphinium pubescens</i> DC.                           | Ranunculaceae  | Therophyte        | Herb    | - | 2 |
| <i>Deverra denudata</i> (Viv.) Pfsterer & Podlech         | Apiaceae       | Chamaephyte       | Shrub   | - | 2 |
| <i>Deverra tortuosa</i> (Desf.) DC.                       | Apiaceae       | Chamaephyte       | Shrub   | - | 2 |
| <i>Dipcadi serotinum</i> (L.) Medik.                      | Hyacinthaceae  | Geophyte          | Herb    | - | 1 |
| <i>Diplotaxis harra</i> (Forssk.) Boiss.                  | Brassicaceae   | Therophyte        | Herb    | - | 2 |
| <i>Diplotaxis simplex</i> Spreng.                         | Brassicaceae   | Therophyte        | Herb    | - | 2 |
| <i>Dittrichia graveolens</i> (L.) Greuter                 | Asteraceae     | Therophyte        | Herb    | - | 0 |
| <i>Echinops spinosissimus</i> Turra                       | Asteraceae     | Hemicryptophyte   | Herb    | - | 1 |
| <i>Echiochilon fruticosum</i> Desf.                       | Boraginaceae   | Chamaephyte       | Shrub   | - | 5 |
| <i>Echium arenarium</i> Guss.                             | Boraginaceae   | Hemicryptophyte   | Herb    | - | 2 |
| <i>Echium horridum</i> Batt.                              | Boraginaceae   | Hemicryptophyte   | Herb    | - | 2 |
| <i>Echium humile</i> Desf.                                | Boraginaceae   | Hemicryptophyte   | Herb    | - | 2 |
| <i>Echium parviflorum</i> Moench                          | Boraginaceae   | Hemicryptophyte   | Herb    | - | 2 |
| <i>Echium plantagineum</i> L.                             | Boraginaceae   | Hemicryptophyte   | Herb    | - | 1 |
| <i>Echium trygorrhizum</i> Pomel                          | Boraginaceae   | Hemicryptophyte   | Herb    | - | 2 |
| <i>Enarthrocarpus clavatus</i> Delile ex Godr.            | Brassicaceae   | Therophyte        | Herb    | - | 2 |
| <i>Ephedra alata</i> Decne.                               | Ephedraceae    | Nanophanerophyte  | Shrub   | - | 3 |
| <i>Ephedra altissima</i> Desf.                            | Ephedraceae    | Nanophanerophyte  | Shrub   | - | 3 |
| <i>Eragrostis papposa</i> (Roem. & Schult.) Steud.        | Poaceae        | Therophyte        | Herb    | - | 4 |
| <i>Erodium arborescens</i> (Desf.) Willd.                 | Geraniaceae    | Hemicryptophyte   | Herb    | - | 1 |
| <i>Erodium cicutarium</i> (L.) L'Hér.                     | Geraniaceae    | Therophyte        | Herb    | - | 2 |
| <i>Erodium crassifolium</i> (Forssk.) L'Hér.              | Geraniaceae    | Hemicryptophyte   | Herb    | - | 2 |
| <i>Erodium glaucophyllum</i> (L.) L'Hér.                  | Geraniaceae    | Hemicryptophyte   | Herb    | - | 1 |
| <i>Erodium laciniatum</i> (Cav.) Willd.                   | Geraniaceae    | Therophyte        | Herb    | - | 3 |
| <i>Erucaria pinnata</i> (Viv.) Täckh. & Boulos            | Brassicaceae   | Therophyte        | Herb    | - | 3 |
| <i>Eryngium ilicifolium</i> Lam.                          | Apiaceae       | Therophyte        | Herb    | - | 0 |
| <i>Eucalyptus camaldulensis</i> Dehnh                     | Myrtaceae      | Macrophanerophyte | Tree    | - | 0 |
| <i>Euphorbia falcata</i> L.                               | Euphorbiaceae  | Therophyte        | Herb    | - | 0 |
| <i>Euphorbia retusa</i> Forssk.                           | Euphorbiaceae  | Therophyte        | Herb    | - | 0 |

|                                                                        |                         |                  |       |    |   |
|------------------------------------------------------------------------|-------------------------|------------------|-------|----|---|
| <i>Euphorbia terracina</i> L.                                          | <i>Euphorbiaceae</i>    | Therophyte       | Herb  | -  | 0 |
| <i>Fagonia cretica</i> L.                                              | <i>Zygophyllaceae</i>   | Chamaephyte      | Shrub | -  | 1 |
| <i>Fagonia glutinosa</i> Delile.                                       | <i>Zygophyllaceae</i>   | Therophyte       | Herb  | -  | 0 |
| <i>Farsetia aegyptia</i> Turra                                         | <i>Brassicaceae</i>     | Chamaephyte      | Shrub | -  | 3 |
| <i>Filago germanica</i> (L.) Huds.                                     | <i>Asteraceae</i>       | Therophyte       | Herb  | -  | 1 |
| <i>Forsskaolea tenacissima</i> L.                                      | <i>Urticaceae</i>       | Hemicryptophyte  | Herb  | -  | 0 |
| <i>Frankenia thymifolia</i> Desf.                                      | <i>Frankeniaceae</i>    | Chamaephyte      | Shrub | -  | 2 |
| <i>Fumaria parviflora</i> Lam.                                         | <i>Fumariaceae</i>      | Therophyte       | Herb  | -  | 0 |
| <i>Gagea fibrosa</i> (Desf.) Schult. & Schult. f.                      | <i>Liliaceae</i>        | Geophyte         | Herb  | -  | 0 |
| <i>Galium aparine</i> L.                                               | <i>Rubiaceae</i>        | Therophyte       | Herb  | -  | 1 |
| <i>Glebionis coronaria</i> (L.) Spach.                                 | <i>Asteraceae</i>       | Therophyte       | Herb  | -  | 1 |
| <i>Gymnarrhena micrantha</i> Desf.                                     | <i>Asteraceae</i>       | Therophyte       | Herb  | -  | 3 |
| <i>Gymnocarpos decander</i> Forssk.                                    | <i>Caryophyllaceae</i>  | Chamaephyte      | Shrub | -  | 5 |
| <i>Halocnemum strobilaceum</i> (Pall.) M. Bieb.                        | <i>Amaranthaceae</i>    | Chamaephyte      | Shrub | -  | 2 |
| <i>Haloxylon schmittianum</i> Pomel                                    | <i>Amaranthaceae</i>    | Chamaephyte      | Shrub | -  | 1 |
| <i>Haloxylon scoparium</i> Pomel                                       | <i>Amaranthaceae</i>    | Chamaephyte      | Shrub | -  | 2 |
| <i>Haplophyllum tuberculatum</i> (Forssk.) Juss.                       | <i>Rutaceae</i>         | Chamaephyte      | Shrub | -  | 0 |
| <i>Helianthemum confertum</i> Dunal                                    | <i>Cistaceae</i>        | Chamaephyte      | Shrub | -  | 3 |
| <i>Helianthemum crassifolium</i> Pers.                                 | <i>Cistaceae</i>        | Chamaephyte      | Shrub | -  | 4 |
| <i>Helianthemum kahircicum</i> Delile.                                 | <i>Cistaceae</i>        | Chamaephyte      | Shrub | -  | 4 |
| <i>Helianthemum lippii</i> var. <i>intricatum</i> Murb.                | <i>Cistaceae</i>        | Chamaephyte      | Shrub | -  | 5 |
| <i>Helianthemum lippii</i> var. <i>sessiliflorum</i> (Desf.) Murb.     | <i>Cistaceae</i>        | Chamaephyte      | Shrub | -  | 5 |
| <i>Helianthemum ruficomum</i> (Viv.) Spreng.                           | <i>Cistaceae</i>        | Chamaephyte      | Shrub | -  | 5 |
| <i>Helianthemum virgatum</i> subsp. <i>africanum</i> (Murb.) Dobignard | <i>Cistaceae</i>        | Chamaephyte      | Shrub | TE | 5 |
| <i>Heliotropium bacciferum</i> Forssk.                                 | <i>Boraginaceae</i>     | Therophyte       | Herb  | -  | 1 |
| <i>Henophyton deserti</i> (Coss. & Durieu) Coss.                       | <i>Brassicaceae</i>     | Chamaephyte      | Shrub | -  | 0 |
| <i>Herniaria fontanesii</i> J. Gay.                                    | <i>Caryophyllaceae</i>  | Hemicryptophyte  | Herb  | -  | 3 |
| <i>Hippocrepis areolata</i> Desv.                                      | <i>Fabaceae</i>         | Therophyte       | Herb  | -  | 4 |
| <i>Hordeum murinum</i> L.                                              | <i>Poaceae</i>          | Therophyte       | Herb  | -  | 3 |
| <i>Hyoscyamus albus</i> L.                                             | <i>Solanaceae</i>       | Hemicryptophyte  | Herb  | -  | 0 |
| <i>Hyparrhenia hirta</i> (L.) Stapf                                    | <i>Poaceae</i>          | Hemicryptophyte  | Herb  | -  | 4 |
| <i>Hypecoum procumbens</i> L.                                          | <i>Fumariaceae</i>      | Therophyte       | Herb  | -  | 1 |
| <i>Hypertelis cerviana</i> (L.) Thulin                                 | <i>Molluginaceae</i>    | Therophyte       | Herb  | -  | 2 |
| <i>Hypochaeris achyrophorus</i> L.                                     | <i>Asteraceae</i>       | Therophyte       | Herb  | -  | 3 |
| <i>Ifloga spicata</i> (Forssk.) Sch. Bip.                              | <i>Asteraceae</i>       | Therophyte       | Herb  | -  | 1 |
| <i>Kickxia aegyptiaca</i> (L.) Nábelek.                                | <i>Scrophulariaceae</i> | Chamaephyte      | Shrub | -  | 2 |
| <i>Koelpinia linearis</i> Pall.                                        | <i>Asteraceae</i>       | Therophyte       | Herb  | -  | 4 |
| <i>Lamarckia aurea</i> (L.) Moench                                     | <i>Poaceae</i>          | Therophyte       | Herb  | -  | 3 |
| <i>Lappula spinocarpos</i> (Forssk.) Asch.                             | <i>Boraginaceae</i>     | Therophyte       | Herb  | -  | 3 |
| <i>Launaea angustifolia</i> (Desf.) Kuntze                             | <i>Asteraceae</i>       | Therophyte       | Herb  | -  | 4 |
| <i>Launaea capitata</i> (Spreng.) Dandy                                | <i>Asteraceae</i>       | Therophyte       | Herb  | -  | 4 |
| <i>Launaea fragilis</i> (Asso) Pau                                     | <i>Asteraceae</i>       | Therophyte       | Herb  | -  | 5 |
| <i>Launaea nudicaulis</i> (Linn.) Hook. f.                             | <i>Asteraceae</i>       | Therophyte       | Herb  | -  | 2 |
| <i>Launaea quercifolia</i> (Desf.) Pamp.                               | <i>Asteraceae</i>       | Therophyte       | Herb  | -  | 4 |
| <i>Lavandula multifida</i> L.                                          | <i>Lamiaceae</i>        | Chamaephyte      | Shrub | -  | 1 |
| <i>Limoniastrum guyonianum</i> Boiss.                                  | <i>Plumbaginaceae</i>   | Hemicryptophyte  | Herb  | -  | 1 |
| <i>Limonium lobatum</i> (L. f.) Chaz.                                  | <i>Plumbaginaceae</i>   | Therophyte       | Herb  | -  | 1 |
| <i>Limonium pruinosum</i> (L.) Chaz.                                   | <i>Plumbaginaceae</i>   | Hemicryptophyte  | Herb  | -  | 1 |
| <i>Limonium tunetanum</i> (Bonnet & Barratte) Maire                    | <i>Plumbaginaceae</i>   | Hemicryptophyte  | Herb  | TE | 1 |
| <i>Linaria laxiflora</i> Desf.                                         | <i>Scrophulariaceae</i> | Therophyte       | Herb  | -  | 3 |
| <i>Lobularia libyca</i> (Viv.) Meissn.                                 | <i>Brassicaceae</i>     | Therophyte       | Herb  | -  | 3 |
| <i>Loeflingia hispanica</i> L.                                         | <i>Caryophyllaceae</i>  | Therophyte       | Herb  | -  | 1 |
| <i>Lomelosia stellata</i> (L.) Raf.                                    | <i>Dipsacaceae</i>      | Therophyte       | Herb  | -  | 3 |
| <i>Lotus creticus</i> L.                                               | <i>Fabaceae</i>         | Hemicryptophyte  | Herb  | -  | 5 |
| <i>Lotus halophilus</i> Boiss. & Spruner                               | <i>Fabaceae</i>         | Therophyte       | Herb  | -  | 3 |
| <i>Lycium shawii</i> Roem. & Schult.                                   | <i>Solanaceae</i>       | Nanophanerophyte | Shrub | -  | 2 |

|                                                           |                 |                   |       |    |   |
|-----------------------------------------------------------|-----------------|-------------------|-------|----|---|
| <i>Lygeum spartum</i> Loefl. ex L.                        | Poaceae         | Hemicryptophyte   | Herb  | -  | 2 |
| <i>Malva aegyptiaca</i> L.                                | Malvaceae       | Therophyte        | Herb  | -  | 3 |
| <i>Marrubium deserti</i> (De Noé) Pomel                   | Lamiaceae       | Chamaephyte       | Shrub | -  | 1 |
| <i>Marrubium vulgare</i> L.                               | Lamiaceae       | Hemicryptophyte   | Herb  | -  | 0 |
| <i>Matthiola longipetala</i> (Vent.) DC.                  | Brassicaceae    | Therophyte        | Herb  | -  | 2 |
| <i>Medicago laciniata</i> (L.) Mill.                      | Fabaceae        | Therophyte        | Herb  | -  | 4 |
| <i>Mesembryanthemum nodiflorum</i> L.                     | Aizoaceae       | Therophyte        | Herb  | -  | 0 |
| <i>Moraea sisyrinchium</i> (L.) Ker Gawl.                 | Iridaceae       | Geophyte          | Herb  | -  | 0 |
| <i>Moricandia arvensis</i> (L.) DC.                       | Brassicaceae    | Chamaephyte       | Shrub | -  | 0 |
| <i>Muricaria prostrata</i> (Desf.) Desv.                  | Brassicaceae    | Therophyte        | Herb  | -  | 2 |
| <i>Nasturtiopsis coronopifolia</i> (Desf.) Boiss.         | Brassicaceae    | Therophyte        | Herb  | -  | 2 |
| <i>Neurada procumbens</i> L.                              | Neuradaceae     | Therophyte        | Herb  | -  | 2 |
| <i>Nicotiana glauca</i> Graham                            | Solanaceae      | Macrophanerophyte | Shrub | -  | 0 |
| <i>Nitraria retusa</i> (Forssk.) Asch.                    | Zygophyllaceae  | Nanophanerophyte  | Shrub | -  | 2 |
| <i>Nolletia chrysocomoides</i> (Desf.) Cass.              | Asteraceae      | Chamaephyte       | Shrub | -  | 2 |
| <i>Nonea calycina</i> (Roem. & Schult.) Selvi et al.      | Boraginaceae    | Therophyte        | Herb  | -  | 2 |
| <i>Olea europaea</i> L. subsp. <i>europaea</i>            | Oleaceae        | Macrophanerophyte | Tree  | -  | 4 |
| <i>Oloptum miliaceum</i> (L.) Röser & Hamasha             | Poaceae         | Hemicryptophyte   | Herb  | -  | 5 |
| <i>Ononis natrix</i> L.                                   | Fabaceae        | Chamaephyte       | shrub | -  | 0 |
| <i>Ononis reclinata</i> L.                                | Fabaceae        | Therophyte        | Herb  | -  | 1 |
| <i>Onopordum espiniae</i> Coss. Ex Bonnet.                | Asteraceae      | Hemicryptophyte   | Herb  | TE | 0 |
| <i>Pallenis hierochuntica</i> (Michon) Greuter.           | Asteraceae      | Therophyte        | Herb  | -  | 1 |
| <i>Pallenis spinosa</i> (L.) Cass.                        | Asteraceae      | Hemicryptophyte   | Herb  | -  | 0 |
| <i>Pancratium maritimum</i> L.                            | Alliaceae       | Geophyte          | Herb  | -  | 0 |
| <i>Papaver hybridum</i> L.                                | Papaveraceae    | Therophyte        | Herb  | -  | 0 |
| <i>Papaver rhoeas</i> L.                                  | Papaveraceae    | Therophyte        | Herb  | -  | 0 |
| <i>Paronychia arabica</i> (L.) DC.                        | Caryophyllaceae | Therophyte        | Herb  | -  | 1 |
| <i>Paronychia capitata</i> (L.) Lam.                      | Caryophyllaceae | Therophyte        | Herb  | -  | 2 |
| <i>Peganum harmala</i> L.                                 | Zygophyllaceae  | Hemicryptophyte   | Herb  | -  | 1 |
| <i>Pennisetum divisum</i> (Forssk. ex J.F. Gmel.) Henrard | Poaceae         | Hemicryptophyte   | Herb  | -  | 3 |
| <i>Periploca angustifolia</i> Labill.                     | Asclepiadaceae  | Nanophanerophyte  | Shrub | -  | 4 |
| <i>Phagnalon rupestre</i> (L.) DC.                        | Asteraceae      | Chamaephyte       | Shrub | -  | 2 |
| <i>Phalaris minor</i> Retz.                               | Poaceae         | Therophyte        | Herb  | -  | 3 |
| <i>Phoenix dactylifera</i> L.                             | Arecaceae       | Phanerophyte      | Herb  | -  | 3 |
| <i>Phragmites australis</i> (Cav.) Steud.                 | Poaceae         | Hemicryptophyte   | Herb  | -  | 2 |
| <i>Picris asplenioides</i> L.                             | Asteraceae      | Therophyte        | Herb  | -  | 4 |
| <i>Picris cupuligera</i> (Durieu) Walp.                   | Asteraceae      | Therophyte        | Herb  | -  | 5 |
| <i>Pistacia atlantica</i> Desf.                           | Anacardiaceae   | Phanerophyte      | Tree  | -  | 3 |
| <i>Plantago afra</i> L.                                   | Plantaginaceae  | Therophyte        | Herb  | -  | 3 |
| <i>Plantago albicans</i> L.                               | Plantaginaceae  | Hemicryptophyte   | Herb  | -  | 5 |
| <i>Plantago ciliata</i> Desf.                             | Plantaginaceae  | Therophyte        | Herb  | -  | 4 |
| <i>Plantago coronopus</i> L.                              | Plantaginaceae  | Therophyte        | Herb  | -  | 2 |
| <i>Plantago ovata</i> Forssk.                             | Plantaginaceae  | Therophyte        | Herb  | -  | 3 |
| <i>Polygonum equisetiforme</i> Sibth. et Sm.              | Polygonaceae    | Hemicryptophyte   | Herb  | -  | 4 |
| <i>Prasium majus</i> L.                                   | Lamiaceae       | Chamaephyte       | Herb  | -  | 3 |
| <i>Pseuderucaria clavata</i> (Boiss. & Reut.) O.E.Schulz  | Brassicaceae    | Therophyte        | Herb  | -  | 2 |
| <i>Pteranthus dichotomus</i> Forssk.                      | Caryophyllaceae | Therophyte        | Herb  | -  | 3 |
| <i>Reaumuria vermiculata</i> L.                           | Tamaricaceae    | Chamaephyte       | Shrub | -  | 1 |
| <i>Reichardia picroides</i> (L.) Roth                     | Asteraceae      | Therophyte        | Herb  | -  | 4 |
| <i>Reichardia tingitana</i> (L.) Roth                     | Asteraceae      | Therophyte        | Herb  | -  | 3 |
| <i>Reseda alba</i> L. subsp. <i>alba</i>                  | Resedaceae      | Therophyte        | Herb  | -  | 1 |
| <i>Reseda arabica</i> Boiss.                              | Resedaceae      | Therophyte        | Herb  | -  | 4 |
| <i>Reseda lutea</i> L. subsp. <i>lutea</i>                | Resedaceae      | Therophyte        | Herb  | -  | 1 |
| <i>Retama raetam</i> (Forssk.) Webb                       | Fbaceae         | Nanophanerophyte  | Shrub | -  | 3 |
| <i>Rhanterium suaveolens</i> Desf.                        | Asteraceae      | Chamaephyte       | Shrub | -  | 2 |
| <i>Rhodalsine geniculata</i> (Poir.) F.N. Williams        | Caryophyllaceae | Chamaephyte       | Shrub | -  | 0 |
| <i>Ricinus communis</i> L.                                | Euphorbiaceae   | Phanerophyte      | Shrub | -  | 0 |

|                                                                                          |                  |                   |       |    |   |
|------------------------------------------------------------------------------------------|------------------|-------------------|-------|----|---|
| <i>Rosmarinus officinalis</i> L.                                                         | Lamiaceae        | Nanophanerophyte  | Shrub | -  | 3 |
| <i>Rostraria litorea</i> (All.) Holub                                                    | Poaceae          | Therophyte        | Herb  | -  | 4 |
| <i>Rumex bipinnatus</i> L.f.                                                             | Polygonaceae     | Therophyte        | Herb  | -  | 4 |
| <i>Rumex roseus</i> L.                                                                   | Polygonaceae     | Therophyte        | Herb  | -  | 4 |
| <i>Rumex spinosus</i> L.                                                                 | Polygonaceae     | Therophyte        | Herb  | -  | 2 |
| <i>Salsola longifolia</i> Forssk.                                                        | Amaranthaceae    | Chamaephyte       | Shrub | -  | 0 |
| <i>Salsola tetragona</i> Delile                                                          | Amaranthaceae    | Chamaephyte       | Shrub | -  | 2 |
| <i>Salsola vermiculata</i> L.                                                            | Amaranthaceae    | Chamaephyte       | Shrub | -  | 2 |
| <i>Salvia aegyptiaca</i> L.                                                              | Lamiaceae        | Chamaephyte       | Shrub | -  | 3 |
| <i>Salvia verbenaca</i> L.                                                               | Lamiaceae        | Chamaephyte       | Shrub | -  | 4 |
| <i>Savignya parviflora</i> (Delile) Webb subsp. <i>longistyla</i> (Boiss. & Reut.) Maire | Brassicaceae     | Therophyte        | Herb  | -  | 5 |
| <i>Scabiosa arenaria</i> Forssk.                                                         | Dipsacaceae      | Therophyte        | Herb  | -  | 3 |
| <i>Schismus barbatus</i> (Loe. ex L.) Thell.                                             | Poaceae          | Therophyte        | Herb  | -  | 4 |
| <i>Scilla villosa</i> Desf.                                                              | Hyacinthaceae    | Geophyte          | Herb  | -  | 0 |
| <i>Scirpoides holoschoenus</i> (L.) Soják                                                | Juncaceae        | Hemicryptophyte   | Herb  | -  | 2 |
| <i>Scorzonera undulata</i> Vahl                                                          | Asteraceae       | Therophyte        | Herb  | -  | 5 |
| <i>Scrophularia arguta</i> Sol.                                                          | Scrophulariaceae | Hemicryptophyte   | Herb  | -  | 0 |
| <i>Searsia tripartita</i> (Ucria) Moffett                                                | Anacardiaceae    | Nanophanerophyte  | Shrub | -  | 3 |
| <i>Senecio glaucus</i> L.                                                                | Asteraceae       | Therophyte        | Herb  | -  | 1 |
| <i>Silene colorata</i> Poir.                                                             | Caryophyllaceae  | Therophyte        | Herb  | -  | 3 |
| <i>Silene muscipula</i> L.                                                               | Caryophyllaceae  | Therophyte        | Herb  | -  | 0 |
| <i>Silene villosa</i> Forssk.                                                            | Caryophyllaceae  | Therophyte        | Herb  | -  | 3 |
| <i>Silene vivianii</i> Steud.                                                            | Caryophyllaceae  | Therophyte        | Herb  | -  | 3 |
| <i>Sisymbrium irio</i> L.                                                                | Brassicaceae     | Therophyte        | Herb  | -  | 0 |
| <i>Solanum nigrum</i> L.                                                                 | Solanaceae       | Hemicryptophyte   | Herb  | -  | 0 |
| <i>Stipa capensis</i> Thunb.                                                             | Poaceae          | Therophyte        | Herb  | -  | 2 |
| <i>Stipa lagascae</i> Roem. & Schult.                                                    | Poaceae          | Hemicryptophyte   | Herb  | -  | 4 |
| <i>Stipa parviflora</i> Desf.                                                            | Poaceae          | Hemicryptophyte   | Herb  | -  | 4 |
| <i>Stipa tenacissima</i> L.                                                              | Poaceae          | Hemicryptophyte   | Herb  | -  | 1 |
| <i>Stipagrostis ciliata</i> (Desf.) de Winter.                                           | Poaceae          | Hemicryptophyte   | Herb  | -  | 4 |
| <i>Stipagrostis plumosa</i> (L.) Munro ex T. Anderson                                    | Poaceae          | Hemicryptophyte   | Herb  | -  | 4 |
| <i>Stipagrostis pungens</i> (Desf.) Winter.                                              | Poaceae          | Hemicryptophyte   | Herb  | -  | 3 |
| <i>Suaeda vera</i> Forssk. ex J.F. Gmel.                                                 | Amaranthaceae    | Nanophanerophyte  | Shrub | -  | 3 |
| <i>Suaeda vermiculata</i> Forssk. ex J.F. Gmel.                                          | Amaranthaceae    | Chamaephyte       | Shrub | -  | 2 |
| <i>Sulla carnosa</i> (Desf.) B.H.Choi & H.Ohashi.                                        | Fabaceae         | Hemicryptophyte   | Herb  | -  | 5 |
| <i>Sulla spinosissima</i> (L.) B.H.Choi & H.Ohashi                                       | Fabaceae         | Therophyte        | Herb  | -  | 3 |
| <i>Tamarix gallica</i> L.                                                                | Tamaricaceae     | Macrophanerophyte | Shrub | -  | 1 |
| <i>Teucrium alopecurus</i> Noé                                                           | Lamiaceae        | Chamaephyte       | Shrub | TE | 0 |
| <i>Teucrium polium</i> L.                                                                | Lamiaceae        | Chamaephyte       | Shrub | -  | 2 |
| <i>Thapsia garganica</i> L.                                                              | Apiaceae         | Hemicryptophyte   | Herb  | -  | 0 |
| <i>Thesium humile</i> Vahl                                                               | Santalaceae      | Therophyte        | Herb  | -  | 0 |
| <i>Thinopyrum junceum</i> (L.) Á.Löve                                                    | Poaceae          | Hemicryptophyte   | Herb  | -  | 1 |
| <i>Thymbra capitata</i> (L.) Cav.                                                        | Lamiaceae        | Chamaephyte       | Shrub | -  | 1 |
| <i>Thymelaea hirsuta</i> (L.) Endl.                                                      | Thymelaeaceae    | Phanerophyte      | Shrub | -  | 0 |
| <i>Thymelaea microphylla</i> Coss. & Durieu ex Meisn                                     | Thymelaeaceae    | Chamaephyte       | Shrub | -  | 3 |
| <i>Thymus algeriensis</i> Boiss. & Reut.                                                 | Lamiaceae        | Chamaephyte       | Shrub | -  | 2 |
| <i>Traganum nudatum</i> Delile                                                           | Amaranthaceae    | Chamaephyte       | Shrub | -  | 3 |
| <i>Tribulus terrestris</i> L.                                                            | Zygophyllaceae   | Therophyte        | Herb  | -  | 1 |
| <i>Trigonella foenum-graecum</i> L.                                                      | Fabaceae         | Therophyte        | Herb  | -  | 4 |
| <i>Trigonella stellata</i> Forssk.                                                       | Fabaceae         | Therophyte        | Herb  | -  | 2 |
| <i>Umbilicus rupestris</i> (Salisb.) Dandy                                               | Crassulaceae     | Geophyte          | Herb  | -  | 0 |
| <i>Vaccaria hispanica</i> (Mill.) Rauschert                                              | Caryophyllaceae  | Therophyte        | Herb  | -  | 0 |
| <i>Verbascum sinuatum</i> L.                                                             | Scrophulariaceae | Hemicryptophyte   | Herb  | -  | 0 |
| <i>Vicia sativa</i> L. subsp. <i>amphicarpa</i> (Dorthes) Batt.                          | Fabaceae         | Therophyte        | Herb  | -  | 5 |
| <i>Volutaria crupinoides</i> (Desf.) Maire                                               | Violaceae        | Therophyte        | Herb  | -  | 2 |
| <i>Volutaria lippii</i> (L.) Maire                                                       | Violaceae        | Therophyte        | Herb  | -  | 2 |

---

|                                 |                       |                   |       |   |   |
|---------------------------------|-----------------------|-------------------|-------|---|---|
| <i>Ziziphus lotus</i> (L.) Lam. | <i>Rhamnaceae</i>     | Macrophanerophyte | Shrub | - | 2 |
| <i>Zygophyllum album</i> L.f.   | <i>Zygophyllaceae</i> | Chamaephyte       | Shrub | - | 0 |

---
